# Supplementary material for: A programmable pAgo nuclease with RNA target preference from the psychrotolerant bacterium Mucilaginibacter paludis
Source: PubMed Central journal article supplement — Nucleic Acids Res. 2022 May 7;50(9):5226–38. doi: 10.1093/nar/gkac315 (PMC9122594; doi:10.1093/nar/gkac315), 2022-05-07
Supplement: gkac315_supplemental_file.pdf [file gkac315_supplemental_file.pdf]

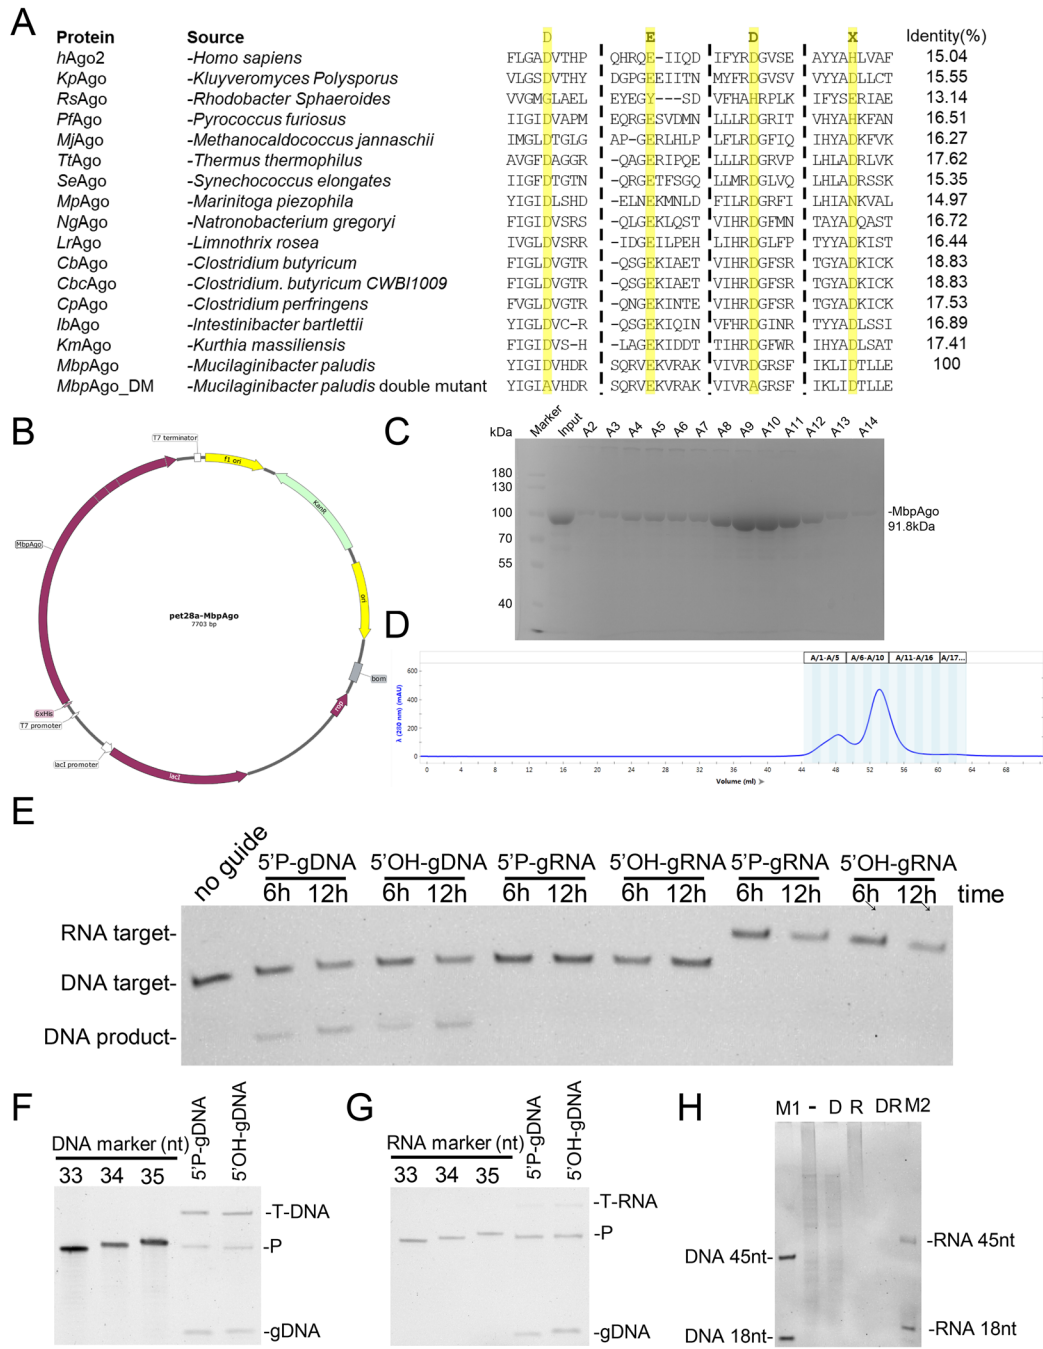

Supplementary Figure S1. *MbpAgo* harbors a catalytically DEDD tetrad. (A) Multiple sequence alignment of a part of the PIWI domain from the *MbpAgo* with several other characterized Ago proteins. (B) Schematic representation of the pET28a based expression vector of *MbpAgo*. (C) The purity of the purified *MbpAgo* was determined using SDS-PAGE. (D) Size-exclusion chromatography diagram showing the elution peak of *MbpAgo*. (E) *MbpAgo* shows DNA cleavage activity at 37°C if incubation is extended. (F) Determining the DNA cleavage site with non-labeled T-DNA. DNA marker (33, 34, 35 nt) were partially hydrolyzed T-DNA. The

experiments were performed at the 4:2:1 *MbpAgo*:guide:target molar ratio for 12 h at 37 °C. Positions of the cleavage products (P) are indicated on the right of the gels. (G) Determining the RNA cleavage site with non-labeled tRNA. RNA marker (33, 34, 35 nt) were partially hydrolyzed tRNA. The experiments were performed at the 4:2:1 *MbpAgo*:guide:target molar ratio for 30 min at 37°C. Positions of the cleavage products (P) are indicated on the right of the gels. (H) Purification of *MbpAgo*-associated nucleic acids after its expression in *E. coli*. Nucleic acids were treated with DNase I (D), RNase A (R), both nucleases (DR), or left untreated (-), separated by denaturing PAGE and stained with SYBR Gold. M1, DNA length markers; M2, RNA length markers.

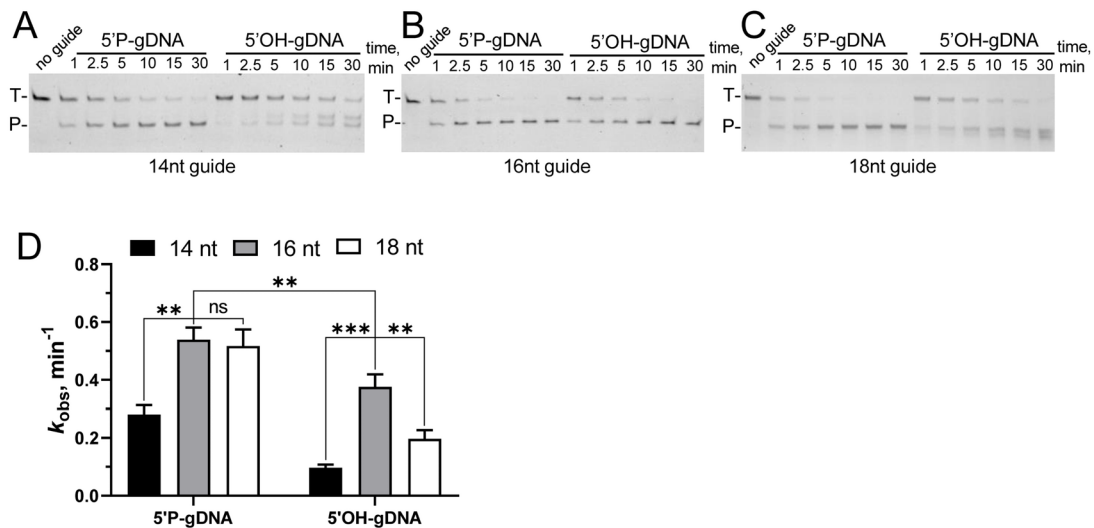

Supplementary Figure S2. Both the length and the 5'-phosphate of guide affect the cleavage efficiency and precision. (A-C) Representative denaturing PAGEs from three independent measurements showing kinetics analysis of RNA cleavage by *MbpAgo* with 14 nt, 16 nt and 18 nt gDNAs, respectively. Positions of the cleavage products (P) and targets (T) are indicated on the left of the gels. (D) Effects of the guide length on the cleavage efficiency of *MbpAgo*. The  $k_{obs}$  values were determined from the single-exponential fits of the data in Figure 2C-E. Means and standard deviations were from three independent measurements. P-values for all comparisons of  $k_{obs}$  values were calculated using the Student's *t*-test. <sup>ns</sup>P > 0.05, <sup>\*\*</sup>P < 0.01 and <sup>\*\*\*</sup>P < 0.001.

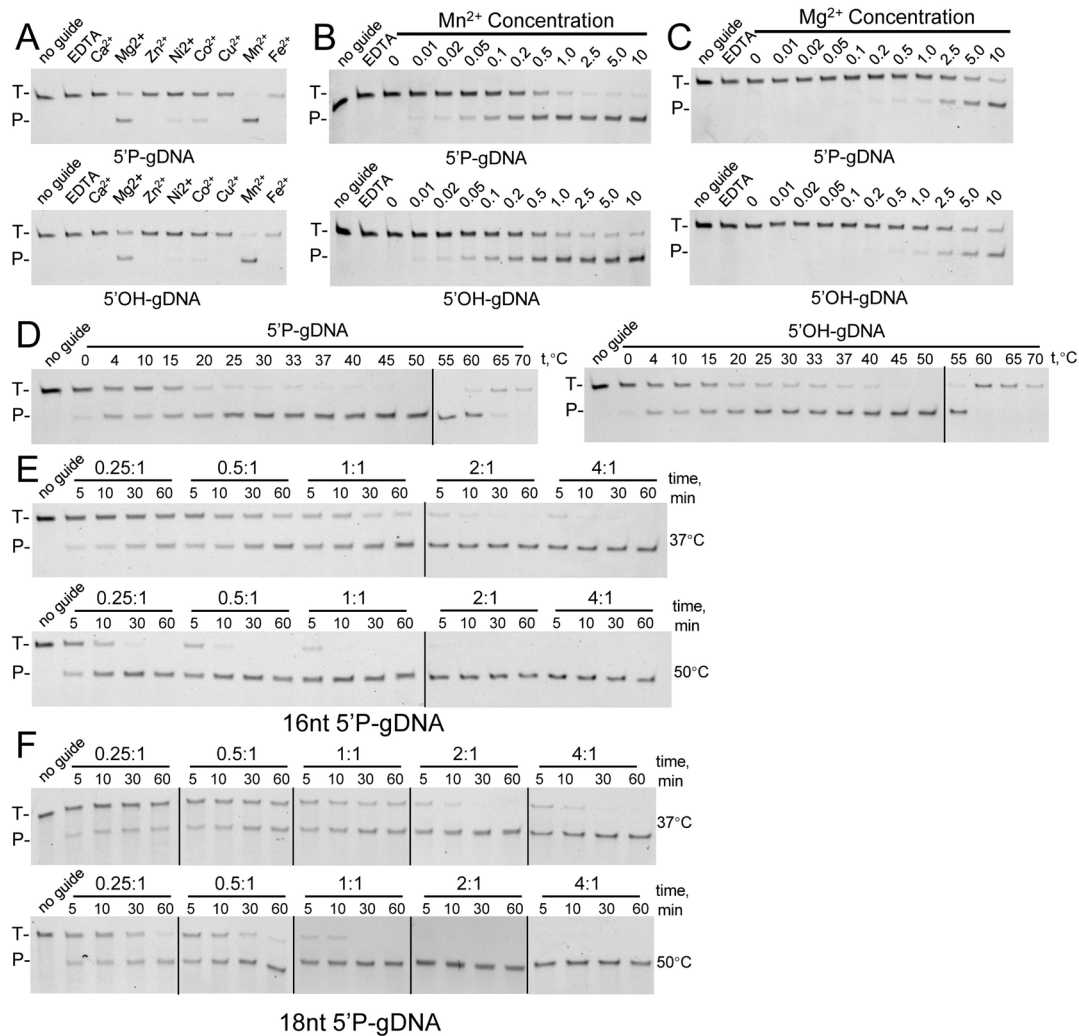

Supplementary Figure S3. Characteristics of nuclease activity of *MbpAgo*. (A) Representative denaturing PAGEs showing 5'P-gDNA-mediated RNA cleavage (Upper panel) and 5'OH-gDNA-mediated RNA cleavage by *MbpAgo* with various divalent cations. Effects of Mn<sup>2+</sup> (B) and Mg<sup>2+</sup> (C) concentration on RNA cleavage activity mediated by 5'P-gDNA (Upper panel) and 5'OH-gDNA (Lower panel). (D) (Left panel) Representative denaturing PAGEs showing temperature dependence of 5'P-gDNA-mediated RNA cleavage by *MbpAgo*. (Right panel) Representative denaturing PAGEs showing temperature dependence of 5'OH-gDNA-mediated RNA cleavage by *MbpAgo*. (E) Representative denaturing PAGEs of the *MbpAgo*-mediated 16 nt 5'P-DNA-guided RNA cleavage turnover experiments at 37°C (upper panel) and 50°C (lower panel), respectively. (F) Representative denaturing PAGEs of the *MbpAgo*-mediated 18 nt 5'P-DNA-guided RNA cleavage turnover experiments at 37°C (upper panel) and 50°C (lower panel), respectively. Positions of the cleavage products (P) and targets (T) are indicated on the left of the gels.

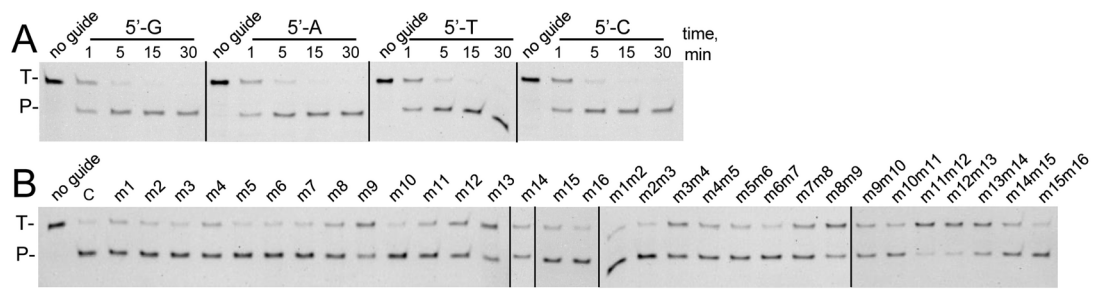

Supplementary Figure S4. Representative denaturing PAGE showing the results in Figure 4.

(A) Representative denaturing PAGE showing the preferences for the 5' end nucleotide. (B)

Representative denaturing PAGE showing effects of mismatches in the guide-target duplex on the slicing activity of *MbpAgo*. Positions of the cleavage products (P) and targets (T) are indicated on the left of the gels.

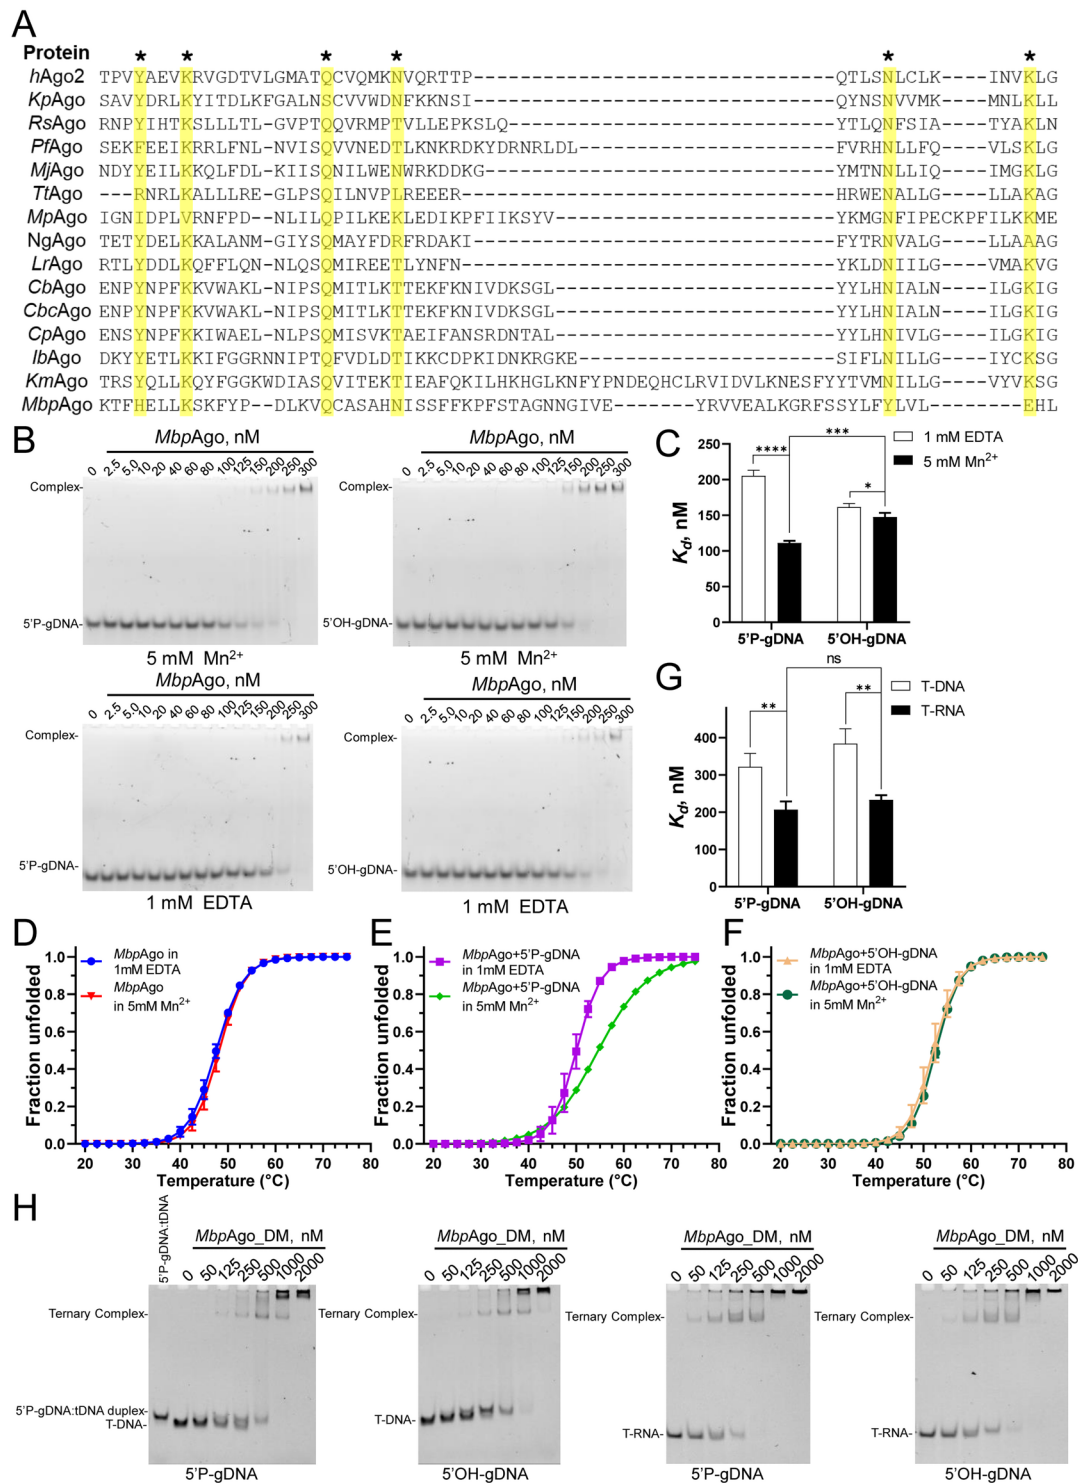

Supplementary Figure S5. Electrophoresis mobility shift assay (EMSA) of the binding of the *MbpAgo* to guides and *MbpAgo*-gDNA complex to target. (A) Multiple sequence alignment of the 5'end guide binding pocket of the MID domain from *MbpAgo* with several other characterized Ago proteins. Black asterisks are the positions of amino acid residues involved in the binding of the 5'end of a guide. (B) Representative native gel images (one of three independent experiments) of binding reactions in Figure 5B with various ratios between

*MbpAgo* and guide. (C) The  $K_d$  values were determined from the data in Figure 5B. Means and standard deviations were from three independent measurements. P-values for all comparisons of  $K_d$  values were calculated using the Student's *t*-test. \* $P < 0.05$ , \*\*\* $P < 0.001$  and \*\*\*\* $P < 0.0001$ . (D), (E) and (F) Thermal unfolding transition curves of *MbpAgo* and *MbpAgo*-gDNA Complex followed by circular dichroism. Measures were performed in duplicate. (G) The  $K_d$  values were determined from the data in Figure 5D. Means and standard deviations were from three independent measurements. P-values for all comparisons of  $K_d$  values were calculated using the Student's *t*-test. <sup>ns</sup> $P > 0.05$ , and \*\* $P < 0.01$ . (H) Representative native gel images (one of three independent experiments) of binding reactions in Figure 5D with various ratios between *MbpAgo*-gDNA complex: target.

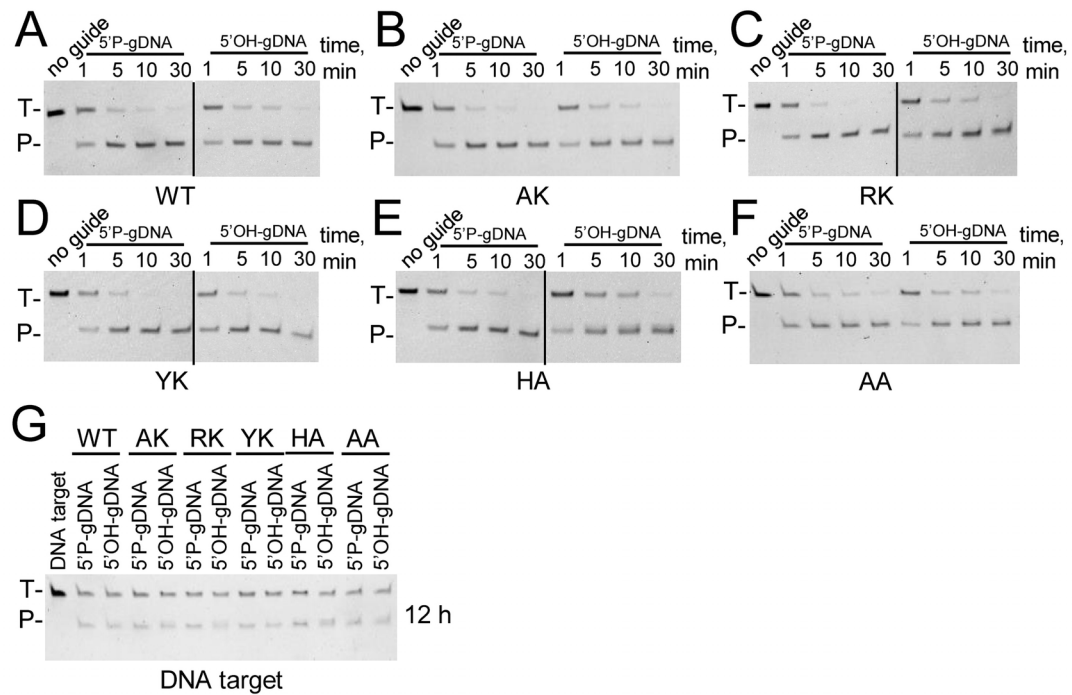

Supplementary Figure S6. Representative denaturing PAGE showing the results in Figure 6. (A)-(F) Representative denaturing PAGE showing kinetics analysis of RNA cleavage by WT, AK variant, RK variant, YK variant, HA variant and AA variant. (G) Cleavage analysis of DNA cleavage by WT, AK variant, RK variant, YK variant, HA variant and AA variant. The reaction was performed at 37°C for 12 h. Positions of the cleavage products (P) and targets (T) are indicated on the left of the gels.



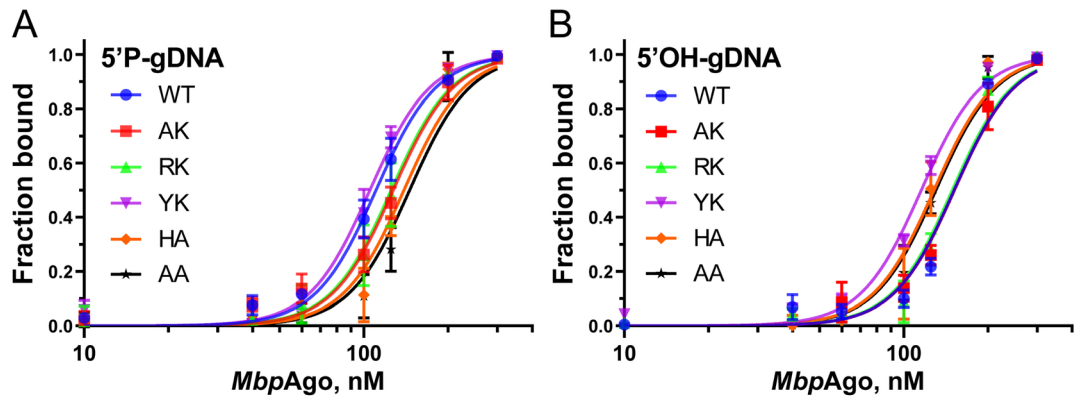

Supplementary Figure S7. (A) and (B) Binding of 16 nt 5'P-gDNA and 5'OH-gDNA by *MbpAgo* variants with 5 mM  $Mn^{2+}$ . The fraction of bound guides was plotted against protein concentration and fitted using the model of specific binding with the Hill slope. Results for WT and its binding analysis of guides are from Figure 5B. Data are represented as the mean  $\pm$  SD from three independent experiments.

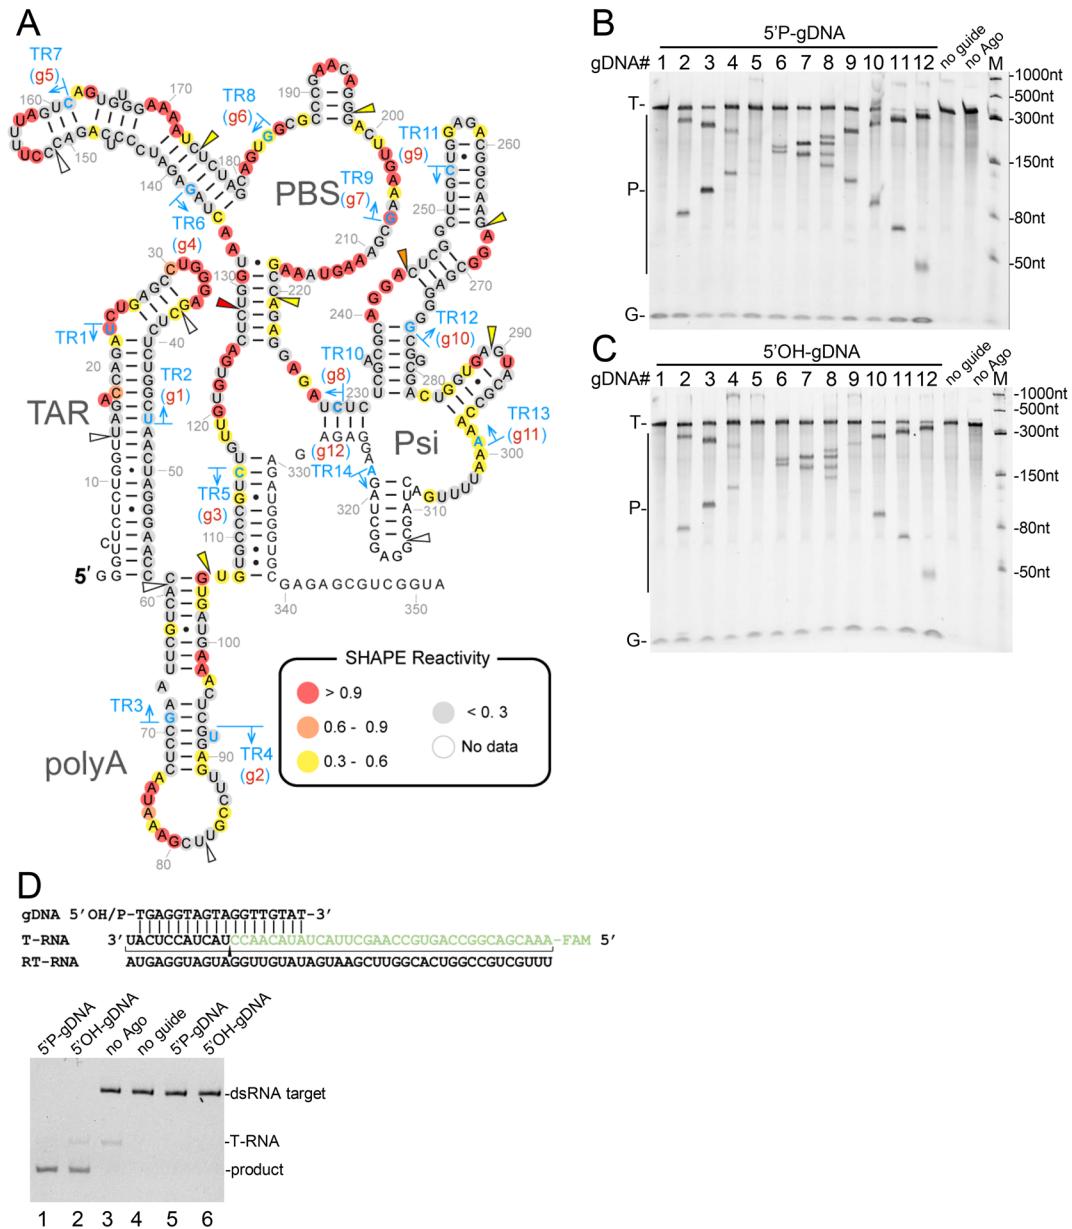

Supplementary Figure S8. Cleavage of highly structured HIV-1  $\Delta$ DIS 5'UTR RNA by *MbpAgo*-gDNA complex with 5 mM  $Mg^{2+}$ . (A) Secondary structure of HIV-1  $\Delta$ DIS 5'UTR predicted by SHAPE, which is copied from Figure 3C of Dayeh et al (1). The highly structured RNA is composed of several structural sub-domains; the transactivation response (TAR; 1–57 nt) element, polyadenylation signal (poly(A); 58–104 nt), primer-binding site (PBS; 125–223 nt), and genomic RNA packaging domain (Psi, 228–334 nt). Designed guide DNAs targeting the different target regions (TRs) of the HIV transcript are marked with g1–g12. (B) Analysis of the cleavage products obtained after incubation of 5'P-gDNA-*MbpAgo* complex with HIV-1  $\Delta$ DIS 5'UTR RNA. (C) Analysis of the cleavage products obtained after incubation of 5'OH-

gDNA-*MbpAgo* complex with HIV-1  $\Delta$ DIS 5'UTR RNA. Experiments in (B) and (C) were carried out with 5 mM  $Mg^{2+}$  at 37°C for 30 min. Positions of the targets (T), gDNAs (G) and cleavage products (P) are indicated on the left of the gels. M, RNA marker. (D) Cleavage analysis of double-stranded RNA (dsRNA) target by *MbpAgo*. lane 1 and 2, ssRNA target; lane 3-6, dsRNA target. FAM-labeled T-RNA and RT-RNA (reverse T-RNA) were denatured for 5 min at 95°C, and temperature was lowered at a rate of 0.1°C/s until 25°C was reached. *MbpAgo*, guide and target (dsRNA or T-RNA) were mixed in a 4:2:1 molar ratio (800 nM *MbpAgo* preloaded with 400 nM guide, plus 200 nM target) and incubated at 37°C for 30 min.

## Supplementary tables

**Table S1. Primers used in constructing mutant**

| Primer                   | Sequence (5'-3')                                                                                        | template          | Mutant |
|--------------------------|---------------------------------------------------------------------------------------------------------|-------------------|--------|
| H482A-F/<br>H482A-R      | TGAAAACCTTC <b>CGC</b> AGAGCTGCTGAAGTCTAAGTTC/<br>CAGCTC <b>TGC</b> GAAGGTTTTTCAGGAAGGCGGGGC            | pET28a-<br>MbpAgo | AK     |
| H482R-F/<br>H482R-R      | TGAAAACCTTC <b>AGA</b> AGAGCTGCTGAAGTCTAAGTTC/<br>CAGCTC <b>TCT</b> GAAGGTTTTTCAGGAAGGCGGGGC            | pET28a-<br>MbpAgo | RK     |
| H482Y-F/<br>H482Y-R      | TGAAAACCTTC <b>TAC</b> AGAGCTGCTGAAGTCTAAGTTC/<br>CAGCTC <b>CTA</b> GAAGGTTTTTCAGGAAGGCGGGGC            | pET28a-<br>MbpAgo | YK     |
| K486A-F/<br>K486A-R      | GCTGCTG <b>GCG</b> TCTAAGTTCTACCCCGATCTGAAGG/<br>AGAACTTAGA <b>CGC</b> CAGCAGCTCGTGGAAGGTTTTTC          | pET28a-<br>MbpAgo | HA     |
| K486A-F/<br>H482AK486A-R | GCTGCTG <b>GCG</b> TCTAAGTTCTACCCCGATCTGAAGG/<br>AGAACTTAGA <b>CGC</b> CAGCAGCTC <b>TGC</b> GAAGGTTTTTC | pET28a-<br>AK     | AA     |

**Table S2. List of let-7-derived sequences used in this study.**

| Oligonucleotide name | Sequence (5'-3')                                              | Description                                       | Used in figure                                                                                                            |
|----------------------|---------------------------------------------------------------|---------------------------------------------------|---------------------------------------------------------------------------------------------------------------------------|
| FAM-T-tDNA           | FAM-<br>AAACGACGGCCAGTGCC<br>AAGCTTACTATACAACCT<br>ACTACCTCAT | 5' FAM labeled T-tDNA                             | 1D, S1J,<br>S6G                                                                                                           |
| M2                   | FAM-<br>AAACGACGGCCAGTGCC<br>AAGCTTACTATACAACC                | 5' FAM labeled 34 nt DNA                          | 1D                                                                                                                        |
| FAM-U-tRNA           | FAM-<br>AAACGACGGCCAGUGCC<br>AAGCUUACUAUACAACC<br>UACUACCUCAU | 5' FAM labeled U-tRNA                             | 1C, S1J,<br>2A-2E,<br>S2A-S2C,<br>3A-3F,<br>S3A-S3F,<br>4A, 4C,<br>S4A-S4B,<br>5D, S5H,<br>6A, 6D<br>6G, S6A-<br>S6F, S8D |
| M1                   | FAM-<br>AAACGACGGCCAGUGCC<br>AAGCUUACUAUACAACC                | 5' FAM labeled 34 nt RNA                          | 1C                                                                                                                        |
| T-gDNA               | TGAGGTAGTAGGTTGT                                              | 16 nt guide forms 5'-T pair with<br>T-tDNA/T-tRNA | 1C-1D,<br>S1H-S1J,<br>2D, S2B,<br>3A-3C,<br>3E, S3A-                                                                      |

|                  |                                                       |                                                |                                                     |
|------------------|-------------------------------------------------------|------------------------------------------------|-----------------------------------------------------|
|                  |                                                       |                                                | 3E, S4A-S4B, 5C-5D, S5D-5H, 6A, 6D, 6G, S6A-6G, S8D |
| 14nt T-gDNA      | TGAGGTAGTAGGTT                                        | 14 nt guide pair with U-tRNA                   | 2C, S2A, 6G, S6G                                    |
| 18nt T-gDNA      | TGAGGTAGTAGGTTGTAT                                    | 18 nt guide pair with U-tRNA                   | S1E, 2E, S2C, 3D, 3F, S3F, 6G, S6G                  |
| 33nt DNA product | AAACGACGGCCAGTGCC<br>AAGCTTACTATACAAC                 | 33 nt DNA marker                               | S1H                                                 |
| 34nt DNA product | AAACGACGGCCAGTGCC<br>AAGCTTACTATACAACC                | 34 nt DNA marker                               |                                                     |
| 35nt DNA product | AAACGACGGCCAGTGCC<br>AAGCTTACTATACAACCT               | 35 nt DNA marker                               |                                                     |
| T-tDNA           | AAACGACGGCCAGTGCC<br>AAGCTTACTATACAACCT<br>ACTACCTCAT | let-7 based 45 nt DNA target for T-gDNA/U-gRNA | S1E, S1H                                            |
| U-gRNA           | UGAGGUAGUAGGUUGU                                      | guide forms 5'-U pair with T-tDNA/T-tRNA       | 1C, 1D, S1J                                         |
| 18 nt RNA        | UGAGGUAGUAGGUUGU<br>AU                                | 18 nt RNA marker                               | S1E                                                 |
| U-tRNA           | AAACGACGGCCAGUGCC<br>AAGCUUACUAUACAACC<br>UACUACCUCAU | let-7 based 45 nt RNA target for T-gDNA/U-gRNA | S1E, S1I                                            |
| 33nt RNA product | AAACGACGGCCAGUGCC<br>AAGCUUACUAUACAAC                 | 33 nt RNA marker                               | S1I                                                 |
| 34nt RNA product | AAACGACGGCCAGUGCC<br>AAGCUUACUAUACAACC                | 34 nt RNA marker                               |                                                     |
| 35nt RNA product | AAACGACGGCCAGUGCC<br>AAGCUUACUAUACAACC<br>U           | 35 nt RNA marker                               |                                                     |
| 8nt T-gDNA       | TGAGGTAG                                              | 8 nt guide pair with U-tRNA                    | 2A, 2B                                              |
| 9nt T-gDNA       | TGAGGTAGT                                             | 9 nt guide pair with U-tRNA                    |                                                     |
| 10nt T-gDNA      | TGAGGTAGTA                                            | 10 nt guide pair with U-tRNA                   |                                                     |
| 11nt T-gDNA      | TGAGGTAGTAG                                           | 11 nt guide pair with U-tRNA                   |                                                     |
| 12nt T-gDNA      | TGAGGTAGTAGG                                          | 12 nt guide pair with U-tRNA                   |                                                     |

|             |                                                  |                                                       |                        |
|-------------|--------------------------------------------------|-------------------------------------------------------|------------------------|
| 13nt T-gDNA | TGAGGTAGTAGGT                                    | 13 nt guide pair with U-tRNA                          |                        |
| 14nt T-gDNA | TGAGGTAGTAGGTT                                   | 14 nt guide pair with U-tRNA                          |                        |
| 15nt T-gDNA | TGAGGTAGTAGGTTG                                  | 15 nt guide pair with U-tRNA                          |                        |
| 16nt T-gDNA | TGAGGTAGTAGGTTGT                                 | guide forms 5'-T pair with T-tDNA/T-tRNA              | 2A, 2B, 4A, 4C, S4A-4B |
| 17nt T-gDNA | TGAGGTAGTAGGTTGTA                                | 17 nt guide pair with U-tRNA                          | 2A, 2B                 |
| 18nt T-gDNA | TGAGGTAGTAGGTTGTAT                               | 18 nt guide pair with U-tRNA                          |                        |
| 19nt T-gDNA | TGAGGTAGTAGGTTGTAT<br>A                          | 19 nt guide pair with U-tRNA                          |                        |
| 20nt T-gDNA | TGAGGTAGTAGGTTGTAT<br>AG                         | 20 nt guide pair with U-tRNA                          |                        |
| 21nt T-gDNA | TGAGGTAGTAGGTTGTAT<br>AGT                        | 21 nt guide pair with U-tRNA                          |                        |
| 25nt T-gDNA | TGAGGTAGTAGGTTGTAT<br>AGTAAGC                    | 25 nt guide pair with U-tRNA                          |                        |
| 30nt T-gDNA | TGAGGTAGTAGGTTGTAT<br>AGTAAGCTTGGC               | 30 nt guide pair with U-tRNA                          |                        |
| 40nt T-gDNA | TGAGGTAGTAGGTTGTAT<br>AGTAAGCTTGGCACTGG<br>CCGTC | 40 nt guide pair with U-tRNA                          |                        |
| gDNA_mm1    | AGAGGTAGTAGGTTGT                                 | guide forms mismatched pair in position 1 with U-tRNA | 4C, S4B                |
| gDNA_mm2    | TCAGGTAGTAGGTTGT                                 | guide forms mismatched pair in position 2 with U-tRNA |                        |
| gDNA_mm3    | TGTGGTAGTAGGTTGT                                 | guide forms mismatched pair in position 3 with U-tRNA |                        |
| gDNA_mm4    | TGACGTAGTAGGTTGT                                 | guide forms mismatched pair in position 4 with U-tRNA |                        |
| gDNA_mm5    | TGAGCTAGTAGGTTGT                                 | guide forms mismatched pair in position 5 with U-tDNA |                        |
| gDNA_mm6    | TGAGGAAGTAGGTTGT                                 | guide forms mismatched pair in position 6 with U-tRNA |                        |

|           |                  |                                                             |
|-----------|------------------|-------------------------------------------------------------|
| gDNA_mm7  | TGAGGTTGTAGGTTGT | guide forms mismatched pair in position 7 with U-tRNA       |
| gDNA_mm8  | TGAGGTACTAGGTTGT | guide forms mismatched pair in position 8 with U-tRNA       |
| gDNA_mm9  | TGAGGTAGAAGGTTGT | guide forms mismatched pair in position 9 with U-tRNA       |
| gDNA_mm10 | TGAGGTAGTTGGTTGT | guide forms mismatched pair in position 10 with U-tRNA      |
| gDNA_mm11 | TGAGGTAGTACGTTGT | guide forms mismatched pair in position 11 with U-tRNA      |
| gDNA_mm12 | TGAGGTAGTAGCTTGT | guide forms mismatched pair in position 12 with U-tRNA      |
| gDNA_mm13 | TGAGGTAGTAGGATGT | guide forms mismatched pair in position 13 with U-tRNA      |
| gDNA_mm14 | TGAGGTAGTAGGTAGT | guide forms mismatched pair in position 14 with U-tRNA      |
| gDNA_mm15 | TGAGGTAGTAGGTTCT | guide forms mismatched pair in position 15 with U-tRNA      |
| gDNA_mm16 | TGAGGTAGTAGGTTGA | guide forms mismatched pair in position 16 with U-tRNA      |
| gDNA_m1m2 | ACAGGTAGTAGGTTGT | guide forms mismatched pair in position 1 and 2 with U-tRNA |
| gDNA_m2m3 | TCTGGTAGTAGGTTGT | guide forms mismatched pair in position 2 and 3 with U-tRNA |
| gDNA_m3m4 | TGTCGTAGTAGGTTGT | guide forms mismatched pair in position 3 and 4 with U-tRNA |
| gDNA_m4m5 | TGACCTAGTAGGTTGT | guide forms mismatched pair in position 4 and 5 with U-tRNA |
| gDNA_m5m6 | TGAGCAAGTAGGTTGT | guide forms mismatched pair in position 5 and 6 with        |

|             |                                                               |                                                               |         |
|-------------|---------------------------------------------------------------|---------------------------------------------------------------|---------|
|             |                                                               | U-tRNA                                                        |         |
| gDNA_m6m7   | TGAGGATGTAGGTTGT                                              | guide forms mismatched pair in position 6 and 7 with U-tRNA   |         |
| gDNA_m7m8   | TGAGGTCTAGGTTGT                                               | guide forms mismatched pair in position 7 and 8 with U-tRNA   |         |
| gDNA_m8m9   | TGAGGTACAAGGTTGT                                              | guide forms mismatched pair in position 8 and 9 with U-tRNA   |         |
| gDNA_m9m10  | TGAGGTAGATGGTTGT                                              | guide forms mismatched pair in position 9 and 10 with U-tRNA  |         |
| gDNA_m10m11 | TGAGGTAGTTCGTTGT                                              | guide forms mismatched pair in position 10 and 11 with U-tRNA |         |
| gDNA_m11m12 | TGAGGTAGTACC TTGT                                             | guide forms mismatched pair in position 11 and 12 with U-tRNA |         |
| gDNA_m12m13 | TGAGGTAGTAGCATGT                                              | guide forms mismatched pair in position 12 and 13 with U-tRNA |         |
| gDNA_m13m14 | TGAGGTAGTAGGAAGT                                              | guide forms mismatched pair in position 13 and 14 with U-tRNA |         |
| gDNA_m14m15 | TGAGGTAGTAGGTA CT                                             | guide forms mismatched pair in position 14 and 15 with U-tRNA |         |
| gDNA_m15m16 | TGAGGTAGTAGGTTCA                                              | guide forms mismatched pair in position 15 and 16 with U-tRNA |         |
| C-gDNA      | CGAGGTAGTAGGTTGT                                              | guide forms 5'-C pair with C-tRNA                             | 4A, S4A |
| FAM-C-tRNA  | FAM-<br>AAACGACGGCCAGUGCC<br>AAGCUUACUAUACAACC<br>UACUACCUCGU | 5' FAM labeled C-tRNA                                         |         |
| A-gDNA      | AGAGGTAGTAGGTTGT                                              | guide forms 5'-A pair with A-tRNA                             |         |
| FAM-A-tRNA  | FAM-<br>AAACGACGGCCAGUGCC<br>AAGCUUACUAUACAACC<br>UACUACCUCUU | 5' FAM labeled A-tRNA                                         |         |
| G-gDNA      | GGAGGTAGTAGGTTGT                                              | guide forms 5'-G pair with                                    |         |



|             |                                                               |                                      |                                |
|-------------|---------------------------------------------------------------|--------------------------------------|--------------------------------|
|             |                                                               | G-tRNA                               |                                |
| FAM-G-tRNA  | FAM-<br>AAACGACGGCCAGUGCC<br>AAGCUUACUUAACAACC<br>UACUACCUCCU | 5' FAM labeled G-tRNA                |                                |
| RT-RNA      | AUGAGGUAGUAGGUUG<br>UAUAGUAAGCUUGGCAC<br>UGGCCGUCGUUU         | 45 nt RNA complementary<br>to U-tRNA | S8D                            |
| T-gDNA iFAM | TGAGGTAGTAGGTT(FAM)<br>GT                                     | internally-labeled T-gDNA            | 5B, S5B,<br>6C, 6F,<br>S7A-S7B |

**Table S3. List of gDNAs targeting HIV-1  $\Delta$ DIS 5'UTR RNA**

| gDNA#   | Sequence (5'-3') | Target region | 5' product length (nt) |
|---------|------------------|---------------|------------------------|
| gDNA_1  | AGCCAGAGAGCTCCCA | 31-46         | 36                     |
| gDNA_2  | ACTCAAGGCAAGCTTT | 77-92         | 82                     |
| gDNA_3  | GACGGGCACACACTAC | 100-115       | 105                    |
| gDNA_4  | CTAGTTACCAGAGTCA | 123-138       | 128                    |
| gDNA_5  | GACTAAAAGGGTCTGA | 146-161       | 151                    |
| gDNA_6  | CACTGCTAGAGATTTT | 169-184       | 174                    |
| gDNA_7  | CTTTCAAGTCCCTGTT | 192-207       | 197                    |
| gDNA_8  | GATCTCCTCTGGCTTT | 215-230       | 220                    |
| gDNA_9  | GCAAGCCGAGTCCTGC | 238-253       | 243                    |
| gDNA_10 | CCCCTCGCCTCTTGCC | 261-276       | 266                    |
| gDNA_11 | TTTGGCGTACTACCA  | 284-299       | 289                    |
| gDNA_12 | TCTAGCCTCCGCTAGT | 307-322       | 312                    |

**Table S4. The sequence of *MbpAgo* expression cassette**

taatagcactactataggggaattgtgagcggataacaattcccctctagaataattttgtttaactttaagaaggagatataccat  
 gggcagcagc **catcatcatcatcatcac** agcagcggcATGAAGGACCACATCCTGAACCTGTACCGGATC  
 GACAACCTGAGCGAGCTGGACTTCAGCTACAAGCTGATCGACTTCGACCTGAGCTTTATC  
 GCCGGCAAAGAGGAAGTCTGAACAAGCAGCTGCAGAAAATCGCCGAAGAGGTGTCCA  
 GCGTGACAAAGGGACCTACCGCCGTGCTGAAGCGGAACCAGAGATTCTTTGTGGCCGT  
 GCCTGCCGACAAGCAGATGGAAGATCGGTCTATCGACGGCATCCCCTTCAGCATCCCCA  
 TCAAGCTGCTGCCGAGGTGTACAGAATCGACAGCAAGGACATCCAGGGCCACCAGCT  
 GGACGTGGTGTACAAGTTCCTGGACTACGAGATCAGACGGCAGCTGGGCCAGCACAGA  
 GATCTGTGGAAGCTGAACACCCACCAGTTCTTTCTGCGGAGCCCATGAAGGGAATCCA

GGGCAGCATCAACGTGTTTCGAGGGCTTCACATACAAGCTGGCCAGACTGGCCGACGGC  
CACTTTTACGTGACACTGGACCTGAGCACCAAGTACATCGACAAGTACTGCCTGAGCCAC  
TACATCAACGAGGGCAACGTGCGGACCTTCGAGAACAACACTACAAGGGCAGAAGATTCT  
GTACCTGAACGGCGACAACCTGGTACACCATCGAGCTGCTCGGCTTCGGCAAGAGCGTGA  
AAGAGCAGGACTTCATCAGAGAGGGCACCACTACAACGTGCTGAATTACATCACCGAG  
AAGATCGAGCACAGCCGGACCGACCTGAAGAGATACGTGAAGCCCAACGACCTGTCCAT  
GAGCTACACATACCCCGGCAGAACAATGGACCCTCACAGCGGAGCTACATCCCTGGCCA  
GAATGCTGTACAACACCAAGGACGAGAGAGTGAAGTCCCTGCACTACCTGTCTATCAAGG  
GCCCCAGCAAGAGATTGAGGCCATCAACAATTACATCTCCAGCTACTTCAAGAACCTGA  
AGTTCAACGCCGGGAAGCTGCTGATCTCCAACGAGCCCCTGGTGGAAAAGATCAAGAAC  
TTCTGGATTCTGAGCTGCTGTTCAACAACAACCGGCGGCTGAAGATCACCGGCTTCAA  
CAGCGGCATGCGGGACTTCGCCTACCAGAGAAAGCAGCTGATTAAGAACAACGGGGTG  
CTGAACAGGACCAGCTTCGACGTGCAGTACCTGCTGGTGCCCGACGAGCAGTACATGGA  
CGCCAATCTGGTGAAGGGTTCAAGAACAATGCCGAGTTCCTGATCAAGAAGCTGGCCC  
CTGCCTTCGACAAGTTCATCATCATCAGATACCCCGTCAAGAGCTGCACCAGCGCCAGC  
GTGCAGATCCAAGAGATCGAGAAGGTGCTGCACAGACGGAATGCCCTGCACGGATTTGC  
TCTGGTGGTGCCTGACCTGGACGCTTTTAGCCCCGCCTTCCTGAAAACCTTCCACG  
AGCTGCTGAAGTCTAAGTTCTACCCCGATCTGAAGGTGCAGTGCGCCAGCGCTCACAA  
ATCTCTAGCTTTTTCAAGCCCTTCTCCACCGCCGGCAACAACGGCATCGTCGAGTACAGA  
GTGGTGAAGCCCTGAAGGGCAGATTCAGCTCCTACCTGTTCTACCTGGTGCCTGGAACA  
CCTGATCGTGAACCGGAAGTGGCCTTACGCTCTGGCCAAGAATCTGTTCTACGACATCTA  
CATCGGCATCGATGTGCACGACCGGCACGCCGGCTTTACATTCTTCTTCAAAAACGGCGA  
ACAGATCATCTTTCACCCCGAGGAAGTGCCCCAGAAAACAACAGCCAGCGCGTGGAAA  
AAGTGCGGGCCAAGACACTGAACAAAGTATCTACGAGAAGCTGAAGCTGTACATCCCA  
CTGTTCCGCCCTAATCCTAATGGCATCGTGCATCGTCCGCGACGGCAGAAGCTTTGGCGT  
CGAGTATAAGGCCCTGCAGGCCGCCATCAATACTCTGGCCGCTGAGGGAATCGTGAACA  
AGGACACCGTGAAGTACGGCGTGGTGGACCTGCACAAGCAGAGCAGCGTGCCAATCAG  
AATCGCCGCCAAGACCAACAGCTACGATCAGCTGGAAAACCCCGTGGCCGGCTCCTATA  
AGCTGGTGTCTCCTAAAGAGGGCTTTATCTTCAGCACAGGCTACCCCTTCGACATCAAGG  
GCACCTCCAGACCTCTGAACCTGAGCATGAAGGAAGGCGACCTGGACTTTATGAAAGTC

ATGGAAGATGTGTTCTGCCAGATCATGCTGGCCTTCAGCGCCCCTGACAAGAGCAACT  
CCTGCCTGTGATCATCAAAGTATCGACACCCTGCTGGAACCTCTGACCGCCACAAGAG  
AAACAGCCGACGAGGCTGAAGAGGACGAAGAGGAAATGATGGACATCAACTAGcgcggatc  
cgaattcgagctccgtcgacaagcttgcggccgactcgagcaccaccaccaccactgagatccggctgtaacaaagcc  
cgaaggaagctgagttggctgctgccaccgctgagcaataactagcataacccttggggcctctaaacgggtcttgggggtt  
ttg

T7 promoter is underlined, Translation initiation codon is marked cyan, His<sub>6</sub> tag is marked yellow, the uppercase letter represents the human codon-optimized sequence of *MbpAgo* gene, T7 terminator is marked with grey.

## REFERENCES

1. Dayeh, D.M., Cantara, W.A., Kitzrow, J.P., Musier-Forsyth, K. and Nakanishi, K. (2018) Argonaute-based programmable RNase as a tool for cleavage of highly-structured RNA. *Nucleic Acids Res.*, 46, e98.
